# Supplementary material for: Methylene blue incorporated mesoporous silica microsphere based sensing scaffold for the selective voltammetric determination of riboflavin
Source: Royal Society of Chemistry journal article supplement (doi:10.1039/c6ra12336h), 2016-01-01
Supplement: c6ra12336h1.pdf [file c6ra12336h1.pdf]

## Electronic Supplementary Information

### **Methylene blue incorporated mesoporous silica microspheres based sensing scaffold for the selective voltammetric determination of riboflavin**

*Rupali Gupta, Pankaj Kumar Rastogi, Utkarsha Srivastava, Vellaichamy Ganesan\*, Piyush Kumar Sonkar and Dharmendra Kumar Yadav*

Department of Chemistry, Faculty of Science, Banaras Hindu University

Varanasi-221 005, UP, India

Telephone: + 91-542-6701609; Fax: + 91-542-2368127

E-mail: [velganesh@yahoo.com](mailto:velganesh@yahoo.com) and [velgan@bhu.ac.in](mailto:velgan@bhu.ac.in)

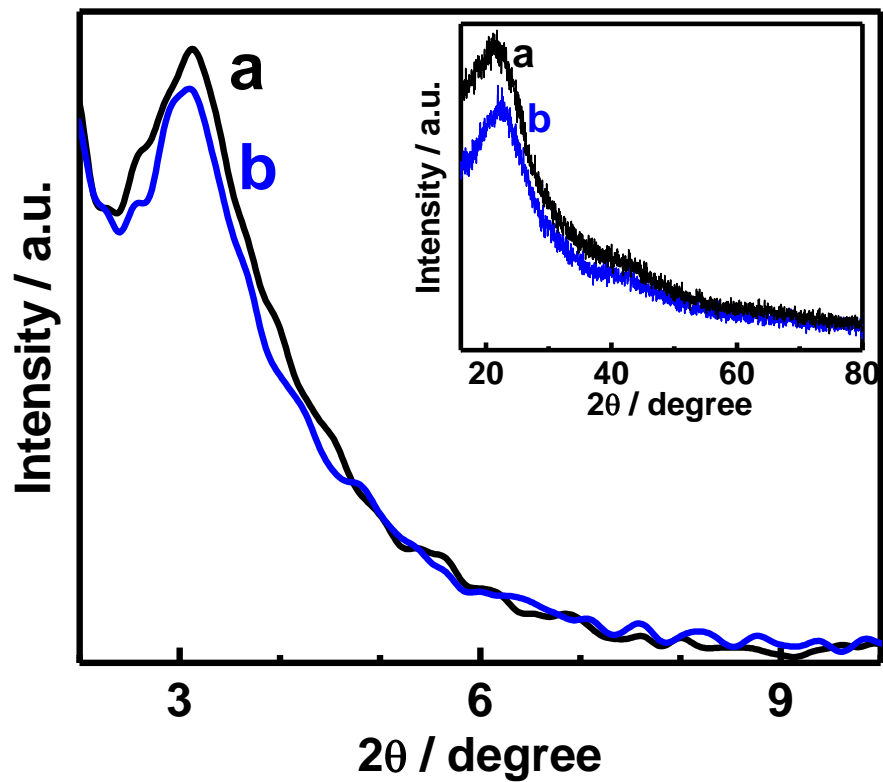

**Fig. S1.** Small angle XRD patterns of (a) SO<sub>3</sub>H-MSM and (b) MB-SO<sub>3</sub>H-MSM; inset shows the wide angle XRD patterns of corresponding materials.

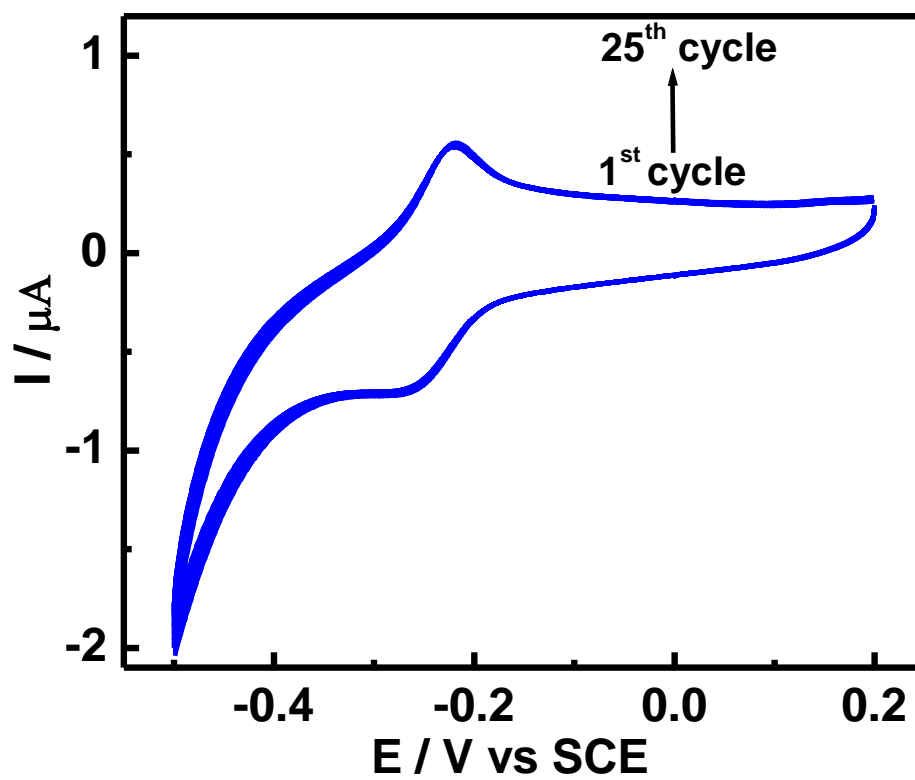

**Fig. S2.** CV of GC/MB-SO<sub>3</sub>H-MSM for 25 consecutive cycles.

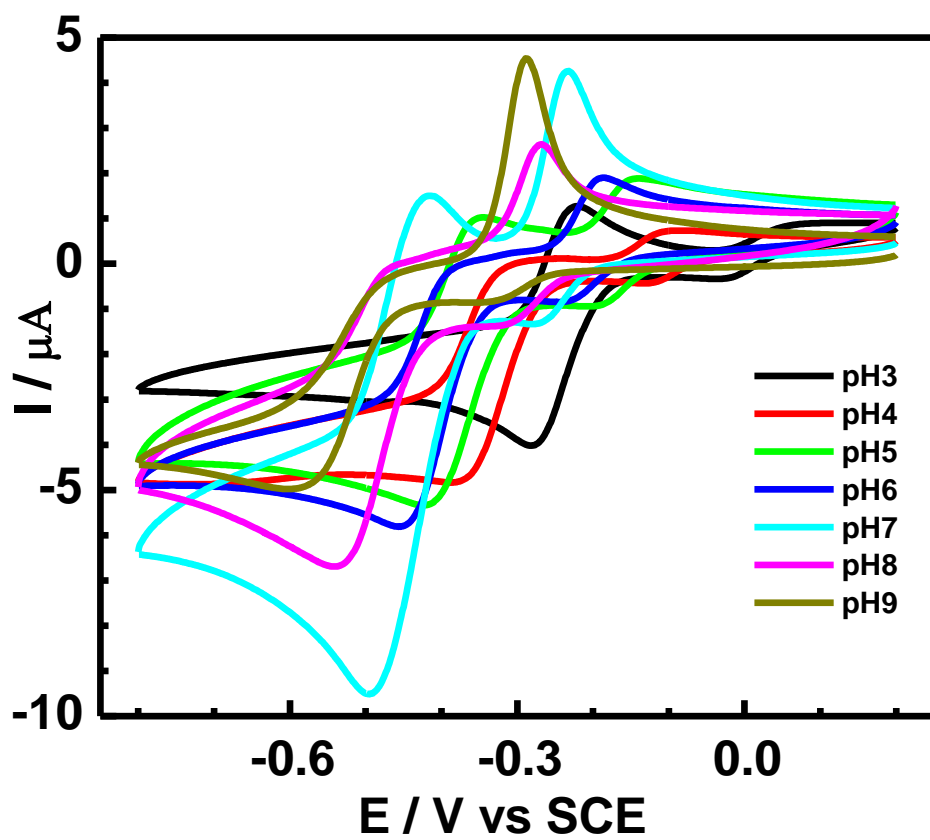

**Fig. S3.** CV curves of 0.5 mM RF at GC/MB-SO<sub>3</sub>H-MSM in PBS solution of pH 3.0, 4.0, 5.0, 6.0, 7.0, 8.0, 9.0.

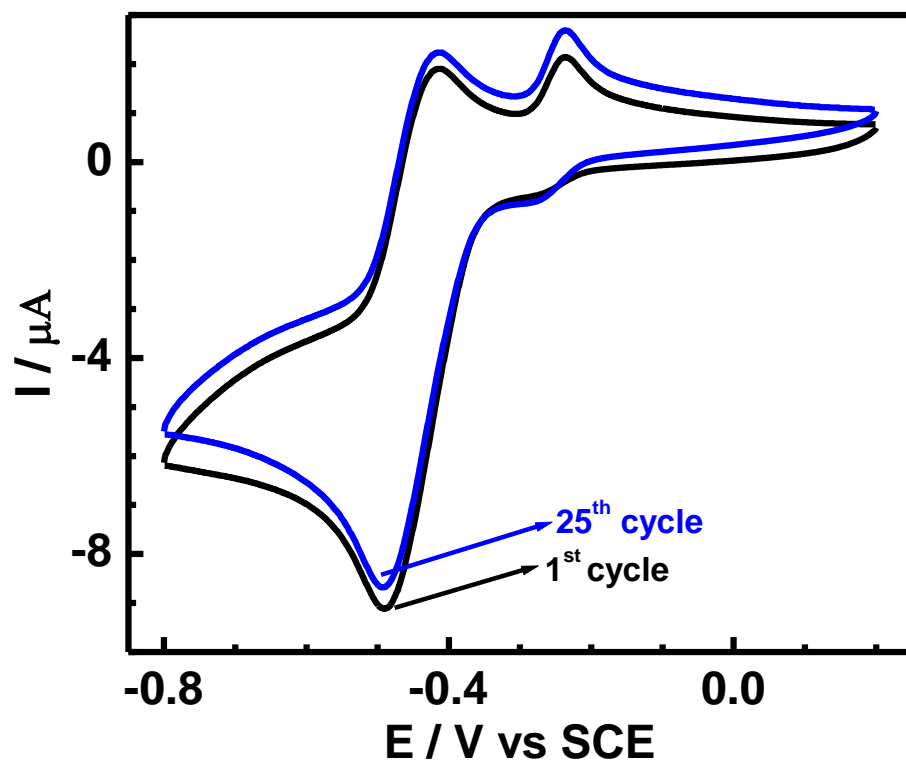

**Fig. S4.** CV responses of GC/MB-SO<sub>3</sub>H-MSM for reduction of 0.5 mM RF in 0.1M pH 7.0 PBS, first and after 25 continuous cycle.

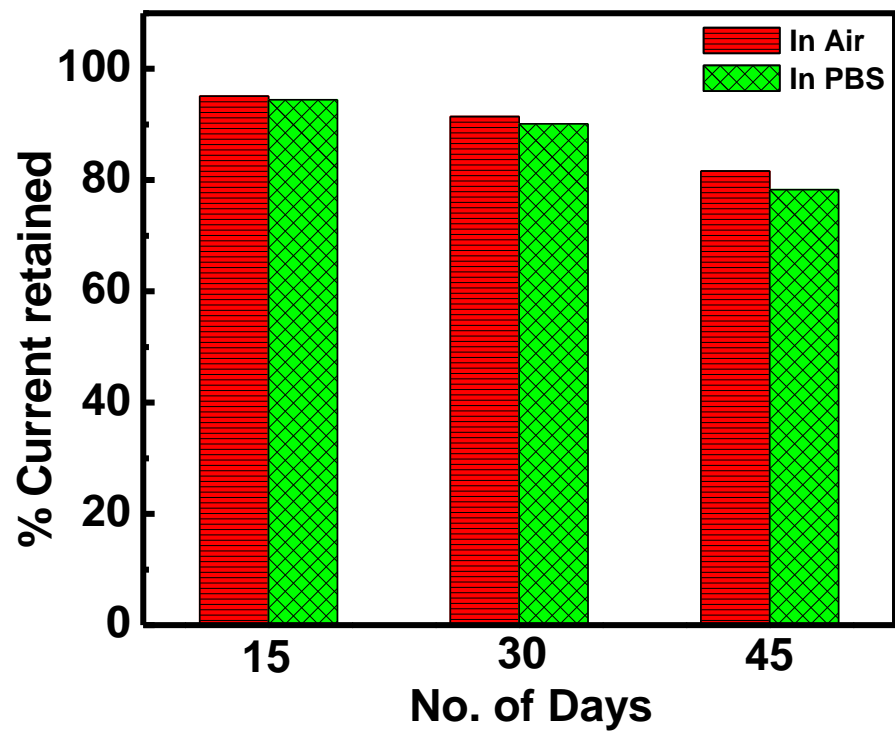

**Fig. S5.** Storage stability response of GC/MB-SO<sub>3</sub>H-MSM for reduction of 0.5 mM RF after storage for 15, 30 and 45 days in air and PBS (pH 7.0) respectively.

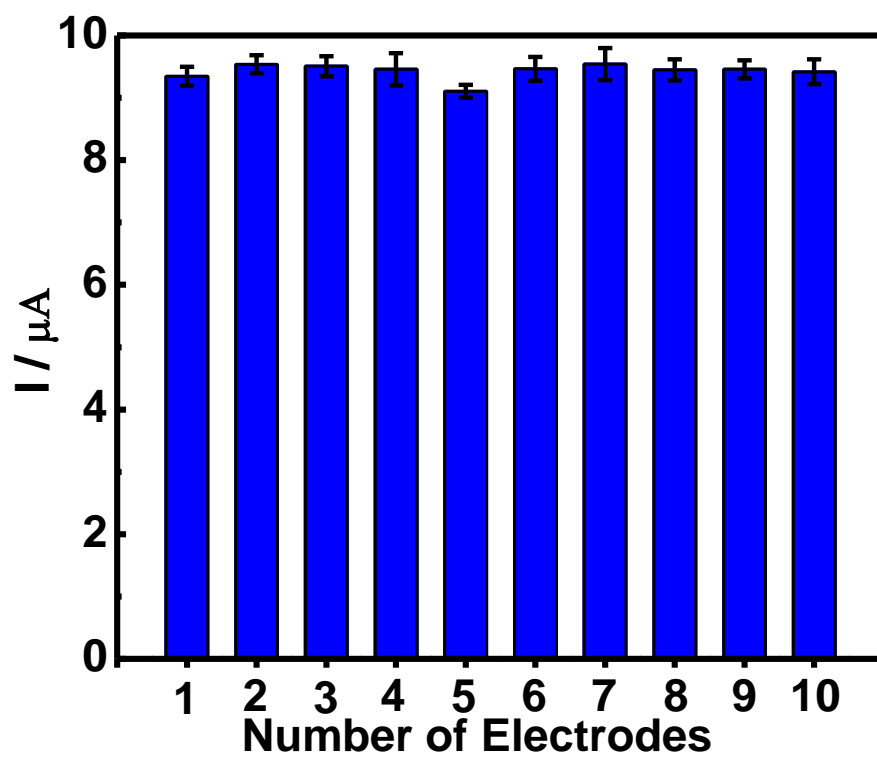

**Fig. S6.** Current response of 0.5 mM RF at ten different GC/MB-SO<sub>3</sub>H-MSM in 0.1M pH 7.0 PBS.
